# Supplementary material for: Gold(i)-containing light-emitting molecules with an inverted singlet–triplet gap
Source: Royal Society of Chemistry journal article supplement (doi:10.1039/d3sc00345k), 2023-01-01
Supplement: d3sc00345k1.pdf [file d3sc00345k1.pdf]

# Gold(I)-Containing Light-Emitting Molecules with an Inverted Singlet-Triplet Gap

Daniel Blasco,<sup>a,b</sup> Rinat T. Nasibullin,<sup>c</sup> Rashid R. Valiev,<sup>a</sup> and Dage Sundholm<sup>\*a</sup>

<sup>a</sup> Department of Chemistry, Faculty of Science, University of Helsinki, P.O. Box 55 (A.I. Virtasen aukio 1), FIN-00014, Helsinki, Finland.

<sup>b</sup> Departamento de Química, Centro de Investigación en Síntesis Química (CISQ), Universidad de La Rioja, Madre de Dios 53, 26006, Logroño, Spain.

<sup>c</sup> Tomsk State University, Lenin Avenue 36, 634050, Tomsk, Russian Federation.

## ELECTRONIC SUPPLEMENTARY INFORMATION

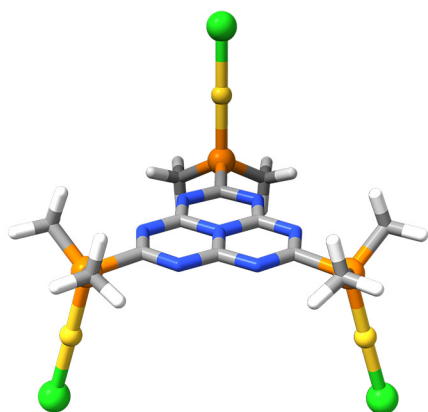

molecule 1

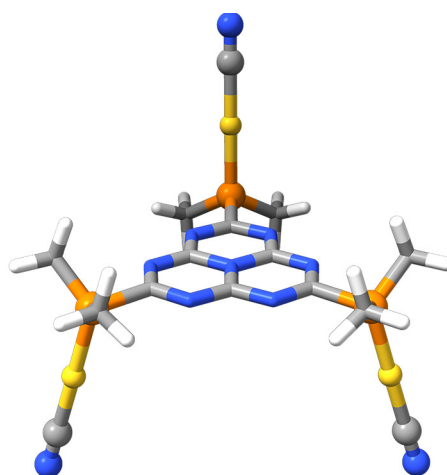

molecule 2

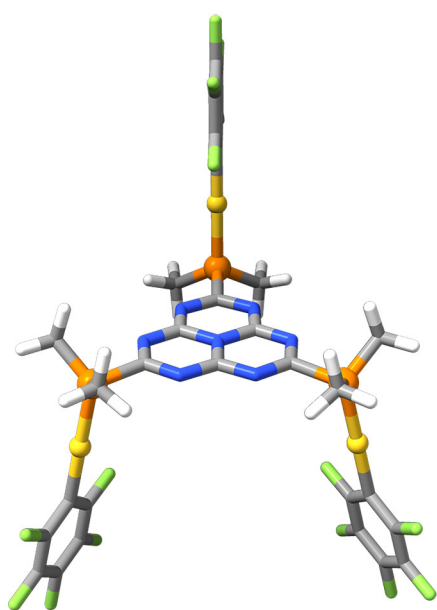

molecule 3

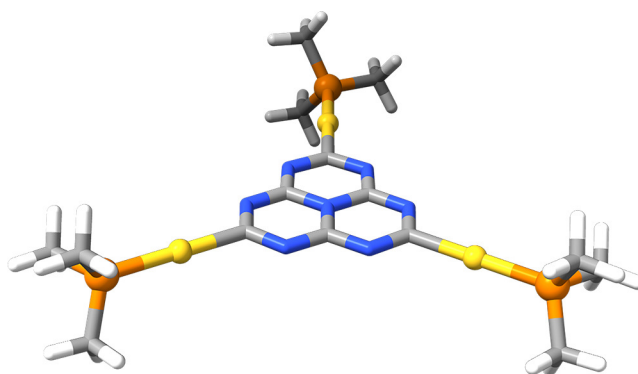

molecule 4

Figure S1: Structure of molecules 1-4 (DFT/PBE0-D3(BJ)/def2-TZVP level of theory). Colour code: C, grey; H, white; Au, yellow; Cl, green; F, light green; N, blue; P, orange.

Table S1: Selected bond distances (in Å) and angles (in °) of heptazine, 2,4,6-tris(diphenylphosphino)heptazine, and molecules **1-4**

| Model                                               | C-N               | C-N <sup>9b</sup> | C-P               | Au-P(C)   | Au-X      |
|-----------------------------------------------------|-------------------|-------------------|-------------------|-----------|-----------|
| Heptazine <sup>a</sup>                              | 1.305(4)-1.369(4) | 1.378(3)-1.397(3) | -                 | -         | -         |
| 2,4,6-tris(diphenylphosphino)heptazine <sup>b</sup> | 1.328(3)-1.341(2) | 1.391(3)-1.394(3) | 1.834(2)-1.841(2) | -         | -         |
| <b>1</b> (X = Cl)                                   | 1.32-1.33         | 1.39              | 1.83              | 2.22-2.23 | 2.26-2.27 |
| <b>2</b> (X = CN)                                   | 1.32-1.33         | 1.39              | 1.83              | 2.27-2.28 | 1.99-2.00 |
| <b>3</b> (X = C <sub>6</sub> F <sub>5</sub> )       | 1.32-1.33         | 1.39              | 1.83              | 2.28      | 2.05      |
| <b>4</b> (X = PMe <sub>3</sub> )                    | 1.33-1.34         | 1.39              | -                 | 2.30      | 2.05      |

<sup>a</sup> R. S. Hosmane, M. A. Rossman and N. J. Leonard, *J. Am. Chem. Soc.*, 1982, **104**, 5497–5499

<sup>b</sup> C. Posern, U. Böhme and E. Kroke, *Z. Anorg. All. Chem.*, 2018, **644**, 121–126

Table S2: First singlet-to-singlet vertical excitation energies at the TD-DFT/PBE0-D3(BJ)/def2-TZVP and TD-DFT/ $\omega$ B97X-D/def2-TZVP levels of theory for molecules **1-4** (energies are given in eV)

| Molecule                   | irrep <sup>a</sup> | $E(S_1 \leftarrow S_0)$ ( $f \cdot 10^4$ ) | Contributions (%)            |        |
|----------------------------|--------------------|--------------------------------------------|------------------------------|--------|
| PBE0 functional            |                    |                                            |                              |        |
| <b>1</b>                   | $a''$              | 2.702 (0.200)                              | 64 $a'' \rightarrow$ 83 $a'$ | (78.4) |
|                            |                    |                                            | 63 $a'' \rightarrow$ 83 $a'$ | (18.7) |
| <b>2</b>                   | $a''$              | 3.000 (3.502)                              | 57 $a'' \rightarrow$ 80 $a'$ | (91.1) |
| <b>3</b>                   | $a$                | 2.281 (0.125)                              | 242 $a \rightarrow$ 243 $a$  | (99.4) |
| <b>4</b>                   | $a$                | 2.951 (0.005)                              | 134 $a \rightarrow$ 135 $a$  | (97.0) |
| <hr/> <hr/>                |                    |                                            |                              |        |
| $\omega$ B97X-D functional |                    |                                            |                              |        |
| <b>1</b>                   | $a''$              | 3.174 (0.509)                              | 60 $a'' \rightarrow$ 83 $a'$ | (93.4) |
| <b>2</b>                   | $a''$              | 3.171 (0.447)                              | 57 $a'' \rightarrow$ 80 $a'$ | (83.2) |
|                            |                    |                                            | 58 $a'' \rightarrow$ 80 $a'$ | (5.1)  |
| <b>3</b>                   | $a$                | 3.187(0.160)                               | 233 $a \rightarrow$ 243 $a$  | (95.1) |
| <b>4</b>                   | $a$                | 3.173 (0.002)                              | 134 $a \rightarrow$ 135 $a$  | (87.6) |
|                            |                    |                                            | 134 $a \rightarrow$ 141 $a$  | (9.6)  |

<sup>a</sup> Irreducible representation

Table S3: First singlet-to-triplet vertical excitation energies at the TD-DFT/PBE0-D3(BJ)/def2-TZVP and TD-DFT/ $\omega$ B97X-D/def2-TZVP levels of theory for molecules **1-4** (energies are given in eV)

| Molecule                   | irrep <sup>a</sup> | $E(T_1 \leftarrow S_0)$ | Contributions (%)            |        |
|----------------------------|--------------------|-------------------------|------------------------------|--------|
| PBE0 functional            |                    |                         |                              |        |
| <b>1</b>                   | $a''$              | 2.652                   | 63 $a'' \rightarrow$ 83 $a'$ | (74.4) |
|                            |                    |                         | 64 $a'' \rightarrow$ 83 $a'$ | (20.6) |
| <b>2</b>                   | $a''$              | 2.760                   | 57 $a'' \rightarrow$ 80 $a'$ | (92.7) |
| <b>3</b>                   | $a$                | 2.278                   | 242 $a \rightarrow$ 243 $a$  | (99.3) |
| <b>4</b>                   | $a$                | 2.736                   | 134 $a \rightarrow$ 135 $a$  | (96.1) |
| <hr/> <hr/>                |                    |                         |                              |        |
| $\omega$ B97X-D functional |                    |                         |                              |        |
| <b>1</b>                   | $a''$              | 2.934                   | 60 $a'' \rightarrow$ 83 $a'$ | (93.1) |
| <b>2</b>                   | $a''$              | 2.928                   | 57 $a'' \rightarrow$ 80 $a'$ | (83.0) |
|                            |                    |                         | 58 $a'' \rightarrow$ 80 $a'$ | (5.0)  |
| <b>3</b>                   | $a$                | 2.948                   | 233 $a \rightarrow$ 243 $a$  | (94.7) |
| <b>4</b>                   | $a$                | 2.956                   | 134 $a \rightarrow$ 135 $a$  | (86.9) |
|                            |                    |                         | 134 $a \rightarrow$ 141 $a$  | (9.7)  |

<sup>a</sup> Irreducible representation

Table S4: Spin contamination of the  $\Delta$ SCF calculations using the PBE0 and  $\omega$ B97X-D functionals

| Molecule | PBE0           |                | $\omega$ B97X-D |                |
|----------|----------------|----------------|-----------------|----------------|
|          | S <sub>1</sub> | T <sub>1</sub> | S <sub>1</sub>  | T <sub>1</sub> |
| <b>1</b> | 1.11           | 2.01           | 1.16            | 2.02           |
| <b>2</b> | 1.12           | 2.02           | 1.16            | 2.02           |
| <b>3</b> | 1.08           | - <sup>a</sup> | 1.16            | 2.02           |

<sup>a</sup> The  $\Delta$ SCF calculation did not converge

# 1 Cartesian coordinates of molecule 1.

|    |            |             |            |
|----|------------|-------------|------------|
| C  | 0.7925856  | -6.9323107  | -1.7660438 |
| P  | 2.1606248  | -6.5123949  | -2.9120869 |
| C  | -0.2445015 | -8.4995372  | -0.5128682 |
| C  | -0.8562813 | -6.1648812  | -0.4263985 |
| C  | -2.5442005 | -5.5741532  | 0.9528847  |
| C  | -2.0112289 | -7.7687565  | 0.9626019  |
| C  | -1.3663296 | -9.9294529  | 0.8283864  |
| N  | -1.0338844 | -7.4774336  | 0.0109666  |
| N  | -2.1639003 | -9.0186344  | 1.3693323  |
| N  | -0.4317701 | -9.7418313  | -0.0932696 |
| N  | 0.6738712  | -8.2071406  | -1.4214721 |
| N  | 0.0782506  | -5.9052491  | -1.3264869 |
| N  | -1.6299809 | -5.2095400  | 0.0646635  |
| N  | -2.7674944 | -6.7895227  | 1.4332326  |
| P  | -1.5214628 | -11.6237600 | 1.5114344  |
| P  | -3.7094710 | -4.2672418  | 1.4936048  |
| Au | -5.4195761 | -4.2754939  | 0.0681876  |
| Au | 3.9292902  | -5.8888054  | -1.7164383 |
| Au | -0.2975304 | -11.7632801 | 3.3632334  |
| C  | -1.0352338 | -12.6886260 | 0.1346599  |
| H  | -1.6801743 | -12.5305903 | -0.7310145 |
| H  | -0.0034751 | -12.4657688 | -0.1339502 |
| H  | -1.1017073 | -13.7269902 | 0.4618107  |
| C  | -2.6924987 | -2.7739130  | 1.5360952  |
| H  | -1.8660222 | -2.8830343  | 2.2400031  |
| H  | -2.2990594 | -2.5904542  | 0.5370911  |
| H  | -3.3219993 | -1.9337886  | 1.8317036  |
| C  | 1.4344668  | -5.2446201  | -3.9785636 |
| H  | 0.5682497  | -5.6327399  | -4.5167628 |
| H  | 1.1332436  | -4.4005510  | -3.3593150 |
| H  | 2.1927817  | -4.9127597  | -4.6886064 |
| C  | 2.3467357  | -7.9989513  | -3.9226932 |
| H  | 2.6174955  | -8.8318696  | -3.2751657 |
| H  | 1.4213825  | -8.2331513  | -4.4510546 |
| H  | 3.1506822  | -7.8296908  | -4.6400930 |
| C  | -3.3068304 | -11.8252925 | 1.7207690  |
| H  | -3.6642018 | -11.0618634 | 2.4107878  |
| H  | -3.8276312 | -11.7304865 | 0.7666076  |
| H  | -3.4967325 | -12.8099269 | 2.1494736  |
| C  | -4.0778941 | -4.7015121  | 3.2087813  |
| H  | -4.5284760 | -5.6929894  | 3.2291112  |
| H  | -3.1717131 | -4.6992901  | 3.8164621  |
| H  | -4.7907706 | -3.9772227  | 3.6045941  |
| Cl | -7.1544598 | -4.2949300  | -1.3900528 |
| Cl | 5.7399103  | -5.2337915  | -0.5247107 |
| Cl | 0.9273851  | -11.9288494 | 5.2605525  |

## 2 Cartesian coordinates of molecule 2.

|    |            |            |            |
|----|------------|------------|------------|
| C  | -0.1209681 | -0.9994638 | -0.9569529 |
| C  | 2.0635738  | -0.6957620 | -1.4435599 |
| C  | 1.2228542  | 0.6844875  | 0.1338074  |
| C  | 0.2267059  | 1.9703606  | 1.7004227  |
| C  | -1.1047840 | 0.4292221  | 0.7241078  |
| C  | -2.2950302 | -1.1497488 | -0.3660827 |
| N  | 0.0007577  | 0.0356652  | -0.0299435 |
| N  | -2.2630246 | -0.1858223 | 0.5430787  |
| N  | -1.2933921 | -1.5939465 | -1.1121414 |
| N  | 0.9375737  | -1.3593989 | -1.6648887 |
| N  | 2.2606688  | 0.3050460  | -0.5969018 |
| N  | 1.3200338  | 1.6701057  | 1.0139219  |
| N  | -0.9717642 | 1.4124568  | 1.5995068  |
| P  | -3.9425757 | -1.8680677 | -0.7216607 |
| P  | 0.3936059  | 3.2402673  | 3.0120485  |
| P  | 3.5297139  | -1.3078270 | -2.3583482 |
| C  | -4.7814222 | -1.8591237 | 0.8786256  |
| H  | -4.2445410 | -2.4701826 | 1.6055259  |
| H  | -4.8398880 | -0.8322669 | 1.2375168  |
| H  | -5.7915484 | -2.2477923 | 0.7437882  |
| C  | -1.1348963 | 4.1966553  | 2.8641763  |
| H  | -1.2147077 | 4.6607849  | 1.8800975  |
| H  | -1.9800086 | 3.5280921  | 3.0246753  |
| H  | -1.1390530 | 4.9665160  | 3.6366509  |
| C  | 4.5981938  | 0.1426658  | -2.4942802 |
| H  | 4.0938954  | 0.9543280  | -3.0202996 |
| H  | 4.8729327  | 0.4730030  | -1.4933219 |
| H  | 5.5015424  | -0.1437441 | -3.0344670 |
| C  | 2.8791625  | -1.6442721 | -4.0125334 |
| H  | 2.0891284  | -2.3899283 | -3.9303990 |
| H  | 2.4824905  | -0.7372788 | -4.4710424 |
| H  | 3.6850128  | -2.0465573 | -4.6275281 |
| C  | -3.5906461 | -3.5917573 | -1.1340872 |
| H  | -2.9253663 | -3.6163870 | -1.9963313 |
| H  | -3.1209832 | -4.1070614 | -0.2950955 |
| H  | -4.5280048 | -4.0857652 | -1.3927726 |
| C  | 1.7382390  | 4.2974429  | 2.4305664  |
| H  | 2.6458842  | 3.7006990  | 2.3492743  |
| H  | 1.5021413  | 4.7355101  | 1.4599217  |
| H  | 1.8974265  | 5.0882307  | 3.1648662  |
| Au | -4.8415528 | -0.5768096 | -2.3671154 |
| Au | 4.3726012  | -3.1026571 | -1.2453277 |
| Au | 0.7055714  | 2.1798231  | 4.9991689  |
| C  | 0.9540944  | 1.2576587  | 6.7505038  |
| N  | 1.0887883  | 0.7225886  | 7.7660152  |
| C  | 5.1049366  | -4.6934962 | -0.2902255 |
| N  | 5.5226739  | -5.6208605 | 0.2585912  |
| C  | -5.5767768 | 0.5894060  | -3.8096140 |
| N  | -5.9834495 | 1.2772112  | -4.6447808 |

### 3 Cartesian coordinates of molecule 3.

|    |            |            |            |
|----|------------|------------|------------|
| C  | 0.4215848  | -0.6344752 | -1.4907473 |
| C  | 2.5008935  | -0.1495015 | -0.7538542 |
| C  | 0.8320692  | 1.0239229  | 0.2158635  |
| C  | -0.9513242 | 2.1200331  | 1.0627810  |
| C  | -1.4279925 | 0.5605619  | -0.4993464 |
| C  | -1.7232208 | -1.0231973 | -2.0825802 |
| N  | -0.0582006 | 0.3136149  | -0.5889324 |
| N  | -2.2595775 | -0.1281500 | -1.2641244 |
| N  | -0.4372446 | -1.3004832 | -2.2481522 |
| N  | 1.7254915  | -0.8512121 | -1.5696515 |
| N  | 2.1284306  | 0.7738125  | 0.1216322  |
| N  | 0.3616839  | 1.9352708  | 1.0524423  |
| N  | -1.8650799 | 1.4803145  | 0.3463412  |
| P  | -2.9160653 | -2.0687398 | -2.9971291 |
| P  | -1.5610497 | 3.5078647  | 2.0887488  |
| P  | 4.2804511  | -0.5801794 | -0.7456849 |
| C  | -2.0284892 | -2.5352456 | -4.5012962 |
| H  | -1.7451337 | -1.6560338 | -5.0815044 |
| H  | -1.1340529 | -3.0904300 | -4.2214861 |
| H  | -2.6747367 | -3.1802859 | -5.0980249 |
| C  | -0.4613214 | 3.5066816  | 3.5240013  |
| H  | -0.5326187 | 2.5669815  | 4.0735443  |
| H  | 0.5617862  | 3.6503192  | 3.1786933  |
| H  | -0.7380104 | 4.3372107  | 4.1745955  |
| C  | 5.1011581  | 1.0140998  | -0.5026896 |
| H  | 4.8717338  | 1.7047436  | -1.3154914 |
| H  | 4.7635786  | 1.4370627  | 0.4427779  |
| H  | 6.1776491  | 0.8460937  | -0.4532355 |
| C  | 4.6140402  | -1.0877433 | -2.4487904 |
| H  | 3.9849752  | -1.9445290 | -2.6870398 |
| H  | 4.4085859  | -0.2774753 | -3.1497087 |
| H  | 5.6610707  | -1.3843538 | -2.5226646 |
| C  | -4.2075391 | -0.9005877 | -3.4904290 |
| H  | -4.6308999 | -0.4536258 | -2.5916075 |
| H  | -3.8065673 | -0.1176139 | -4.1358135 |
| H  | -4.9893730 | -1.4489260 | -4.0172069 |
| C  | -3.1811901 | 2.9474156  | 2.6636106  |
| H  | -3.8099421 | 2.7520735  | 1.7957749  |
| H  | -3.0938272 | 2.0398467  | 3.2626291  |
| H  | -3.6325647 | 3.7415972  | 3.2595396  |
| Au | -1.5042442 | 5.3308132  | 0.7224340  |
| Au | -3.5502855 | -3.7468546 | -1.5947587 |
| Au | 4.5923899  | -2.1455475 | 0.8779087  |
| C  | -1.4213236 | 6.9188641  | -0.5733334 |
| C  | -0.9423340 | 6.7721531  | -1.8621725 |
| C  | -1.8364560 | 8.1898451  | -0.2200707 |
| C  | -0.8718507 | 7.8191196  | -2.7649651 |
| C  | -1.7848150 | 9.2674886  | -1.0886220 |
| C  | -1.2978579 | 9.0768721  | -2.3712414 |
| C  | 4.8573419  | -3.5426147 | 2.3550951  |
| C  | 4.0548818  | -3.5694656 | 3.4812454  |
| C  | 5.8422887  | -4.5109390 | 2.2854394  |
| C  | 4.2081868  | -4.5015924 | 4.4934121  |
| C  | 6.0327474  | -5.4630750 | 3.2726653  |
| C  | 5.2068543  | -5.4552430 | 4.3846340  |
| C  | -4.1281106 | -5.2303305 | -0.3026465 |



|   |            |            |            |
|---|------------|------------|------------|
| C | -4.1010019 | -5.0477019 | 1.0680554  |
| C | -4.5696332 | -6.4642537 | -0.7443127 |
| C | -4.4882341 | -6.0273032 | 1.9664888  |
| C | -4.9664922 | -7.4737824 | 0.1164726  |
| C | -4.9242466 | -7.2497966 | 1.4827415  |
| F | -3.6863149 | -3.8819680 | 1.5842199  |
| F | -4.4493711 | -5.8152052 | 3.2781593  |
| F | -5.3002941 | -8.2020979 | 2.3247020  |
| F | -5.3858881 | -8.6478982 | -0.3439365 |
| F | -4.6291774 | -6.7277535 | -2.0562272 |
| F | 3.0743823  | -2.6678112 | 3.6312862  |
| F | 3.4174736  | -4.4965828 | 5.5618269  |
| F | 5.3717965  | -6.3573577 | 5.3417786  |
| F | 6.9899948  | -6.3795811 | 3.1718366  |
| F | 6.6658746  | -4.5585996 | 1.2301345  |
| F | -0.5177824 | 5.5734323  | -2.2919796 |
| F | -0.4046318 | 7.6382432  | -3.9971551 |
| F | -1.2396694 | 10.0943169 | -3.2192548 |
| F | -2.1926602 | 10.4754842 | -0.7142208 |
| F | -2.3150086 | 8.4241131  | 1.0081581  |

#### 4 Cartesian coordinates of molecule 4 ( $S_0$ geometry).

|    |            |            |            |
|----|------------|------------|------------|
| C  | -0.0223868 | -1.3895448 | -0.0009576 |
| C  | 2.2665614  | -1.3586142 | -0.0007087 |
| C  | 1.2180368  | 0.6763406  | -0.0004191 |
| C  | 0.0466891  | 2.6431511  | -0.0001259 |
| C  | -1.1912799 | 0.7176154  | -0.0006942 |
| C  | -2.3089365 | -1.2802102 | -0.0011788 |
| N  | 0.0014476  | 0.0014530  | -0.0006905 |
| N  | -2.3437835 | 0.0584436  | -0.0009687 |
| N  | -1.1917598 | -2.0184431 | -0.0011443 |
| N  | 1.1247161  | -2.0581437 | -0.0009542 |
| N  | 2.3472804  | -0.0219768 | -0.0004581 |
| N  | 1.2234222  | 2.0040243  | -0.0001705 |
| N  | -1.1512244 | 2.0447607  | -0.0003888 |
| Au | 0.0825934  | 4.6930553  | 0.0004563  |
| Au | 4.0247717  | -2.4131897 | -0.0010814 |
| Au | -4.1023605 | -2.2737246 | -0.0016964 |
| P  | -6.1171781 | -3.3927850 | -0.0020308 |
| P  | 5.9997648  | -3.6011389 | -0.0006706 |
| P  | 0.1195443  | 6.9974637  | 0.0016887  |
| C  | 1.7778401  | 7.7438652  | -0.0448317 |
| H  | 1.7247294  | 8.8352473  | -0.0417045 |
| H  | 2.3492642  | 7.4057740  | 0.8208739  |
| H  | 2.2986424  | 7.4084141  | -0.9428899 |
| C  | -0.7362771 | 7.7787055  | -1.4009853 |
| H  | -1.7800921 | 7.4614215  | -1.4076493 |
| H  | -0.6880698 | 8.8686540  | -1.3402884 |
| H  | -0.2771497 | 7.4472897  | -2.3335355 |
| C  | -0.6544302 | 7.7751549  | 1.4530574  |
| H  | -0.1426942 | 7.4413562  | 2.3569284  |
| H  | -0.6095589 | 8.8652492  | 1.3924443  |
| H  | -1.6962333 | 7.4579668  | 1.5186589  |
| C  | 7.5053753  | -2.5970649 | -0.1857508 |
| H  | 7.5570546  | -1.8723428 | 0.6281104  |
| H  | 8.4037471  | -3.2189982 | -0.1764237 |
| H  | 7.4564402  | -2.0443780 | -1.1251202 |
| C  | 6.3150314  | -4.5620256 | 1.5118558  |
| H  | 5.4997341  | -5.2706938 | 1.6646429  |
| H  | 7.2612869  | -5.1048413 | 1.4490488  |
| H  | 6.3407229  | -3.8874086 | 2.3688947  |
| C  | 6.1504941  | -4.8393869 | -1.3251199 |
| H  | 7.1033785  | -5.3710387 | -1.2672614 |
| H  | 5.3304246  | -5.5543899 | -1.2443022 |
| H  | 6.0708404  | -4.3432095 | -2.2934969 |
| C  | -6.3674976 | -4.5207852 | -1.4074513 |
| H  | -5.5714521 | -5.2667709 | -1.4164330 |
| H  | -7.3359190 | -5.0233420 | -1.3475340 |
| H  | -6.3100612 | -3.9551205 | -2.3385805 |
| C  | -6.4038068 | -4.4553730 | 1.4467829  |
| H  | -7.3706683 | -4.9607325 | 1.3852886  |
| H  | -5.6086961 | -5.1997111 | 1.5101961  |
| H  | -6.3698210 | -3.8475971 | 2.3521775  |
| C  | -7.5919061 | -2.3285557 | -0.0450893 |
| H  | -8.5110104 | -2.9194830 | -0.0428372 |
| H  | -7.5837567 | -1.6667229 | 0.8221982  |
| H  | -7.5618239 | -1.7076631 | -0.9416803 |

## 5 Cartesian coordinates of molecule 4 ( $S_1$ geometry).

|    |            |            |            |
|----|------------|------------|------------|
| C  | 1.3851072  | -0.0015812 | 0.2359577  |
| C  | 1.3338405  | 2.3042258  | 0.2324567  |
| C  | -0.6911842 | 1.2003286  | 0.2359577  |
| C  | -2.6624383 | 0.0030269  | 0.2324567  |
| C  | -0.6939230 | -1.1987474 | 0.2359577  |
| C  | 1.3285978  | -2.3072527 | 0.2324567  |
| N  | 0.0000000  | -0.0000000 | -0.0293533 |
| N  | -0.0201488 | -2.3299986 | 0.3329374  |
| N  | 2.0254806  | -1.1522524 | 0.3316570  |
| N  | 2.0279124  | 1.1475499  | 0.3329374  |
| N  | -0.0148604 | 2.3302438  | 0.3316570  |
| N  | -2.0077635 | 1.1824487  | 0.3329374  |
| N  | -2.0106201 | -1.1779914 | 0.3316570  |
| Au | -4.6950581 | 0.0059681  | 0.1013877  |
| Au | 2.3526975  | 4.0630556  | 0.1013877  |
| Au | 2.3423606  | -4.0690236 | 0.1013877  |
| P  | 3.4837413  | -6.0513054 | -0.0459855 |
| P  | 3.4987136  | 6.0426611  | -0.0459855 |
| P  | -6.9824549 | 0.0086443  | -0.0459855 |
| C  | 3.4142347  | -6.8745763 | -1.6660389 |
| H  | 3.9756489  | -7.8119785 | -1.6606855 |
| H  | 2.3730480  | -7.0759883 | -1.9215941 |
| H  | 3.8261032  | -6.2084368 | -2.4252820 |
| C  | -7.6606750 | 0.4804742  | -1.6660389 |
| H  | -8.7531962 | 0.4629763  | -1.6606855 |
| H  | -7.3145097 | 1.4828743  | -1.9215941 |
| H  | -7.2897156 | -0.2092841 | -2.4252820 |
| C  | 4.2464404  | 6.3941021  | -1.6660389 |
| H  | 4.7775474  | 7.3490022  | -1.6606855 |
| H  | 4.9414617  | 5.5931140  | -1.9215941 |
| H  | 3.4636124  | 6.4177210  | -2.4252820 |
| C  | 2.9232593  | -7.3445669 | 1.1020550  |
| H  | 1.8686908  | -7.5547916 | 0.9186348  |
| H  | 3.5038988  | -8.2622754 | 0.9819114  |
| H  | 3.0221019  | -6.9828189 | 2.1263394  |
| C  | -7.8222111 | 1.1406666  | 1.1020550  |
| H  | -7.4769869 | 2.1590621  | 0.9186348  |
| H  | -8.9072898 | 1.0966723  | 0.9819114  |
| H  | -7.5583494 | 0.8741924  | 2.1263394  |
| C  | 4.8989518  | 6.2039002  | 1.1020550  |
| H  | 5.4033910  | 7.1656031  | 0.9819114  |
| H  | 4.5362476  | 6.1086264  | 2.1263394  |
| H  | 5.6082961  | 5.3957295  | 0.9186348  |
| C  | 5.2661867  | -5.9318401 | 0.2883931  |
| H  | 5.7531625  | -6.9060968 | 0.2031596  |
| H  | 5.7185926  | -5.2358379 | -0.4192714 |
| H  | 5.4169431  | -5.5364158 | 1.2937524  |
| C  | 2.5040308  | 7.5265715  | 0.2883931  |
| H  | 2.0862052  | 7.4594182  | 1.2937524  |
| H  | 3.1042740  | 8.4354332  | 0.2031596  |
| H  | 1.6750723  | 7.5703654  | -0.4192714 |
| C  | -7.7702175 | -1.5947314 | 0.2883931  |
| H  | -7.5031483 | -1.9230024 | 1.2937524  |
| H  | -8.8574365 | -1.5293365 | 0.2031596  |
| H  | -7.3936649 | -2.3345275 | -0.4192714 |

## 6 Cartesian coordinates of molecule 4 ( $T_1$ geometry).

|    |            |            |            |
|----|------------|------------|------------|
| C  | 1.3926675  | -0.0019652 | 0.0933578  |
| C  | 1.3356990  | 2.3059695  | 0.1010576  |
| C  | -0.6946318 | 1.2070680  | 0.0933578  |
| C  | -2.6648776 | 0.0037645  | 0.1010576  |
| C  | -0.6980356 | -1.2051028 | 0.0933578  |
| C  | 1.3291786  | -2.3097340 | 0.1010576  |
| N  | -0.0000000 | 0.0000000  | -0.0680534 |
| N  | -0.0249090 | -2.3395309 | 0.1530375  |
| N  | 2.0353229  | -1.1539346 | 0.1527261  |
| N  | 2.0385477  | 1.1481937  | 0.1530375  |
| N  | -0.0183248 | 2.3396087  | 0.1527261  |
| N  | -2.0136388 | 1.1913373  | 0.1530375  |
| N  | -2.0169982 | -1.1856740 | 0.1527261  |
| Au | -4.7009897 | 0.0066758  | 0.0427476  |
| Au | 2.3562762  | 4.0678386  | 0.0427476  |
| Au | 2.3447134  | -4.0745144 | 0.0427476  |
| P  | 3.4878618  | -6.0591557 | -0.0207383 |
| P  | 3.5034518  | 6.0501548  | -0.0207383 |
| P  | -6.9913137 | 0.0090009  | -0.0207383 |
| C  | 3.4499634  | -6.9313704 | -1.6159505 |
| H  | 4.0098528  | -7.8686745 | -1.5710965 |
| H  | 2.4138386  | -7.1395557 | -1.8862837 |
| H  | 3.8778946  | -6.2887530 | -2.3865664 |
| C  | -7.7277245 | 0.4779293  | -1.6159505 |
| H  | -8.8193984 | 0.4617028  | -1.5710965 |
| H  | -7.3899559 | 1.4793323  | -1.8862837 |
| H  | -7.3851672 | -0.2139788 | -2.3865664 |
| C  | 4.2777611  | 6.4534411  | -1.6159505 |
| H  | 4.8095456  | 7.4069717  | -1.5710965 |
| H  | 4.9761173  | 5.6602234  | -1.8862837 |
| H  | 3.5072725  | 6.5027318  | -2.3865664 |
| C  | 2.9057786  | -7.3178302 | 1.1546910  |
| H  | 1.8554055  | -7.5355392 | 0.9562339  |
| H  | 3.4896868  | -8.2378945 | 1.0749041  |
| H  | 2.9831817  | -6.9245573 | 2.1691700  |
| C  | -7.7903162 | 1.1424370  | 1.1546910  |
| H  | -7.4536711 | 2.1609413  | 0.9562339  |
| H  | -8.8790694 | 1.0967898  | 1.0749041  |
| H  | -7.4884334 | 0.8787675  | 2.1691700  |
| C  | 4.8845376  | 6.1753932  | 1.1546910  |
| H  | 5.3893825  | 7.1411047  | 1.0749041  |
| H  | 4.5052517  | 6.0457898  | 2.1691700  |
| H  | 5.5982656  | 5.3745979  | 0.9562339  |
| C  | 5.2635688  | -5.9288629 | 0.3439589  |
| H  | 5.7519531  | -6.9051154 | 0.2980069  |
| H  | 5.7296220  | -5.2547053 | -0.3759385 |
| H  | 5.3952728  | -5.5026086 | 1.3393670  |
| C  | 2.5027615  | 7.5228157  | 0.3439589  |
| H  | 2.0677624  | 7.4237477  | 1.3393670  |
| H  | 3.1040288  | 8.4338953  | 0.2980069  |
| H  | 1.6858973  | 7.5893508  | -0.3759385 |
| C  | -7.7663303 | -1.5939528 | 0.3439589  |
| H  | -7.4630353 | -1.9211390 | 1.3393670  |
| H  | -8.8559820 | -1.5287798 | 0.2980069  |
| H  | -7.4155193 | -2.3346455 | -0.3759385 |
